# Supplementary material
Source: PubMed Central journal article supplement (PMC2141916)
Supplement: pnas_0705927104_9.pdf [file pnas_0705927104_9.pdf]

**SI Table 1.**Comparison of properties of T-type Ca<sup>2+</sup> currents

| Reference  | Tissue                | [Ca <sup>2+</sup> ] <sub>ext</sub> ,<br>mM | IV <sub>peak</sub> ,<br>mV | V <sub>0.5act</sub> ,<br>mV | V <sub>0.5inact</sub> ,<br>mV | $\tau_{\text{deact } 1,2}$ ,<br>ms | $\tau_{\text{decay } 1,2}$ ,<br>ms | $\tau_{\text{recovery}}$ ,<br>ms | Nickel-<br>sensitive |
|------------|-----------------------|--------------------------------------------|----------------------------|-----------------------------|-------------------------------|------------------------------------|------------------------------------|----------------------------------|----------------------|
| This study | Chicken<br>hair cells | 5                                          | -15                        | -38                         | -37                           | 0.35<br>24                         | 35<br>330                          | 40<br>1,200                      | Yes                  |
| 1          | Olfactory             | 3                                          | -40                        | -45                         | -66                           | -                                  | -                                  | -                                | Yes                  |
| 2          | Cone<br>bipolar       | 10                                         | -30                        | -36                         | -59                           | -                                  | 30                                 | -                                | Yes                  |
| 3          | Myocytes              | 2                                          | -30                        | -42                         | -68                           | 1.3                                | 13                                 |                                  | Yes                  |
| 4          | Skeletal<br>muscle    | 10                                         | -15                        | -24                         | -41                           | -                                  | 16                                 | 224<br>5,160                     | Yes                  |
| 5          | Cochlear<br>nucleus   | 2                                          | -40                        | -59                         | -89                           | -                                  | -                                  | -                                | Yes                  |

1. Kawai, F. & Miyachi, E. (2001) *J Neurosci* 21, RC144.
2. Pan, Z. H. (2000) *J Neurophysiol* 83, 513-27.
3. Leuranguer, V., Monteil, A., Bourinet, E., Dayanithi, G. & Nargeot, J. (2000) *Am J Physiol Heart Circ Physiol* 279, H2540-8.
4. Berthier, C., Monteil, A., Lory, P. & Strube, C. (2002) *J Physiol* 539, 681-91.
5. Doughty, J. M., Barnes-Davies, M., Rusznak, Z., Harasztosi, C. & Forsythe, I. D. (1998) *J Physiol* 512 ( Pt 2), 365-76.
