# Supplementary material
Source: PubMed Central journal article supplement (PMC2141916)

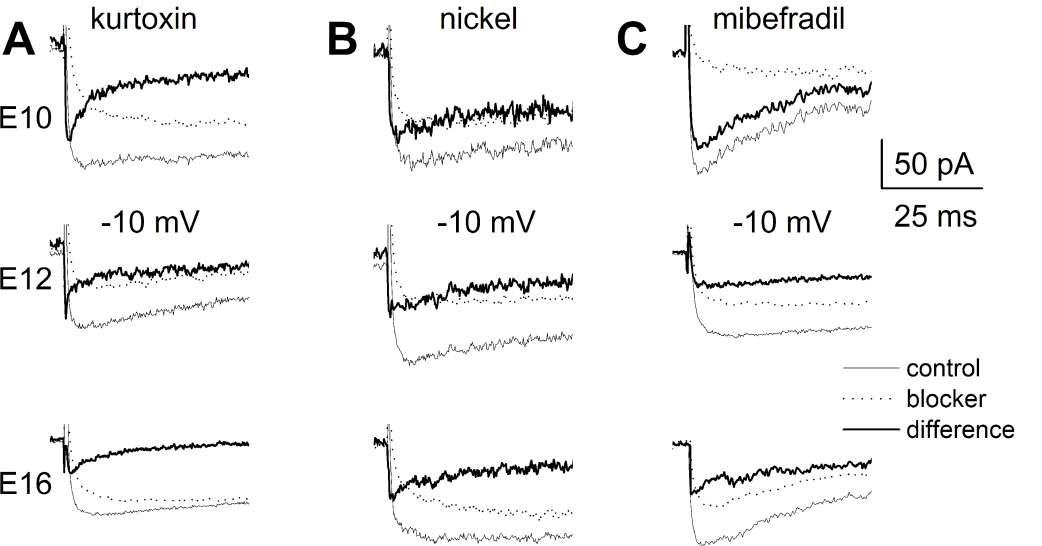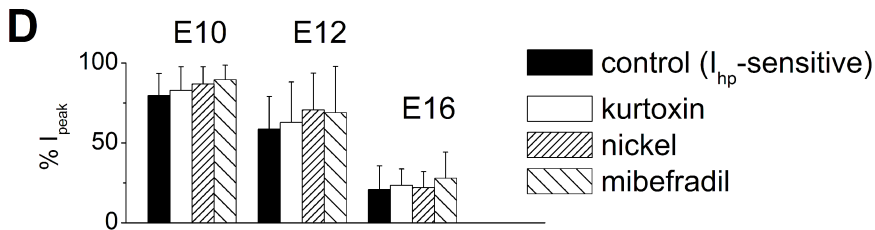

Supplement: pnas_0705927104_1.pdf [file pnas_0705927104_1.pdf]

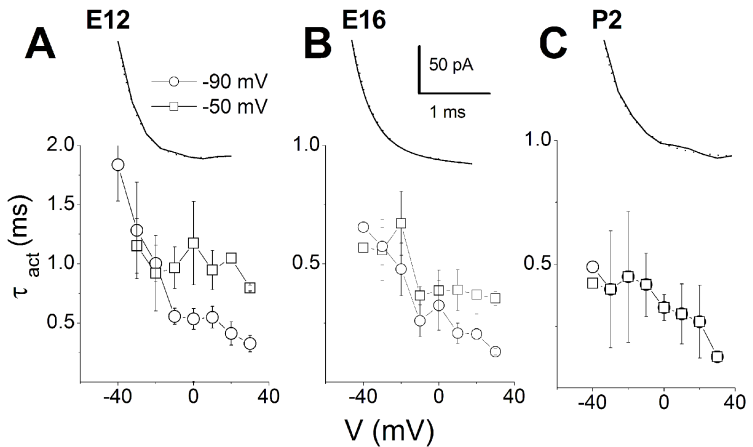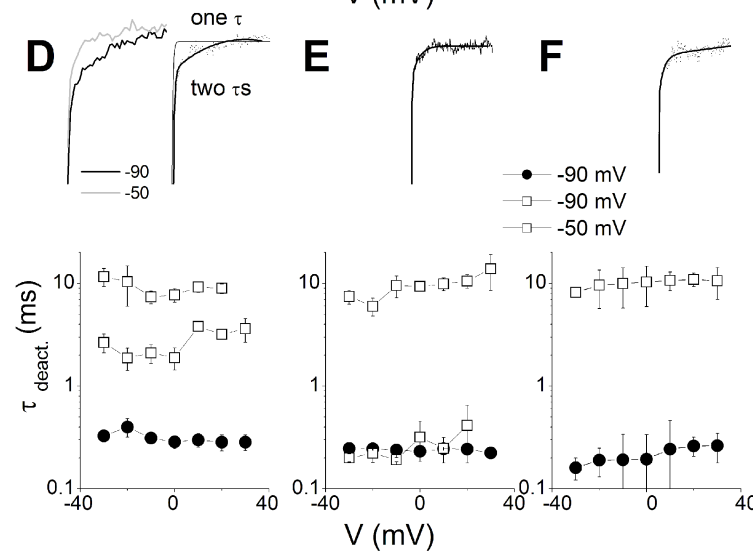

Supplement: pnas_0705927104_2.pdf [file pnas_0705927104_2.pdf]

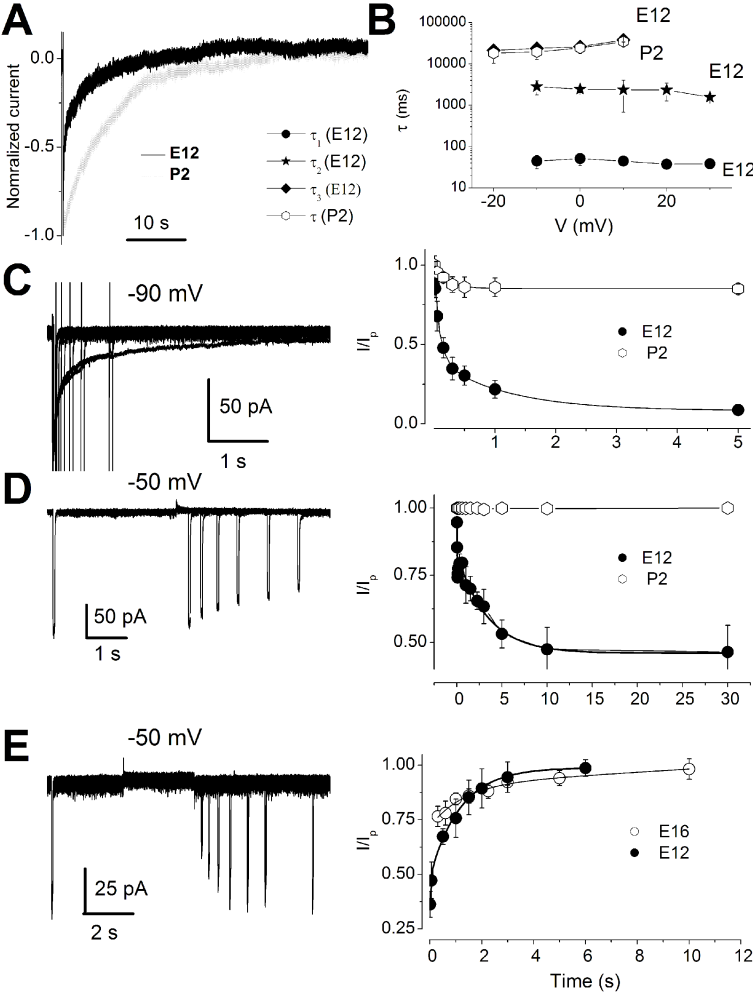

Supplement: pnas_0705927104_3.pdf [file pnas_0705927104_3.pdf]

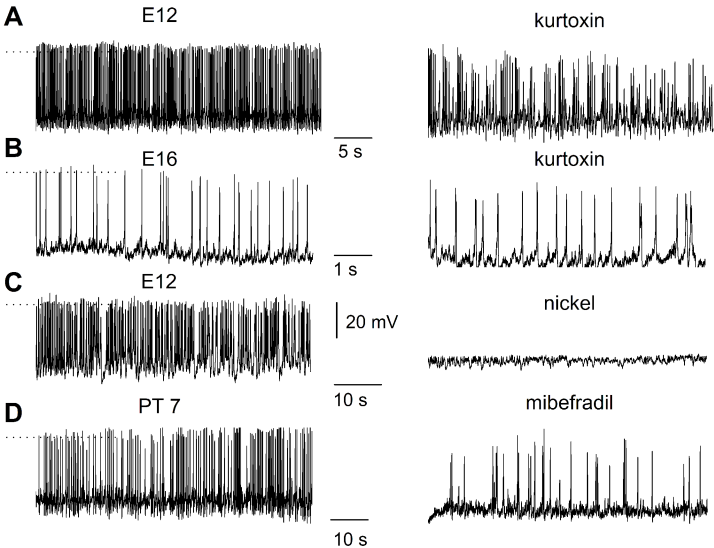

Supplement: pnas_0705927104_4.pdf [file pnas_0705927104_4.pdf]

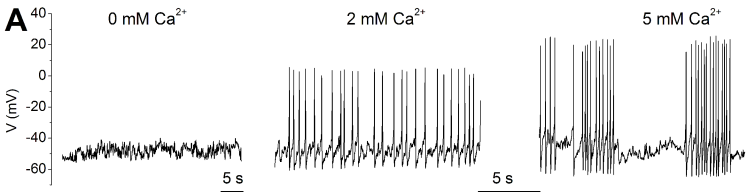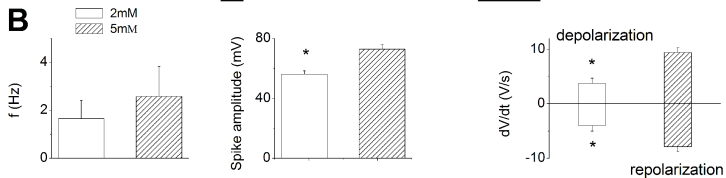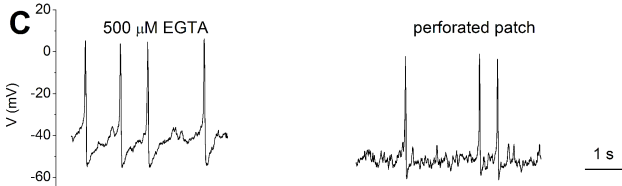

Supplement: pnas_0705927104_5.pdf [file pnas_0705927104_5.pdf]

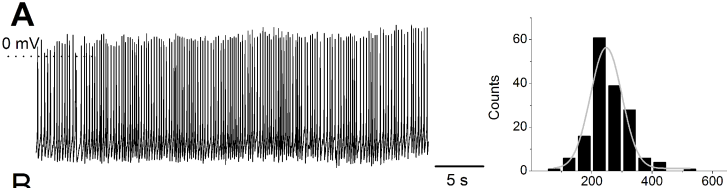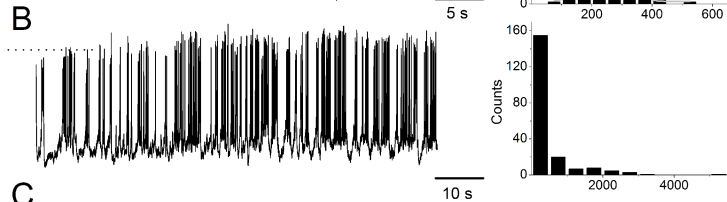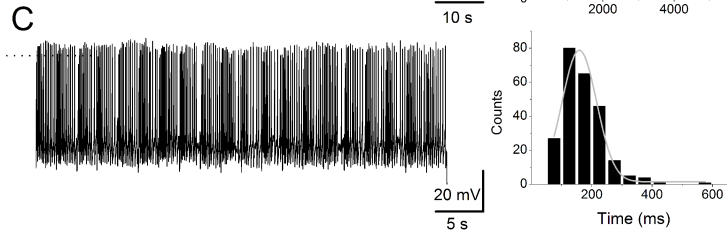

Supplement: pnas_0705927104_6.pdf [file pnas_0705927104_6.pdf]

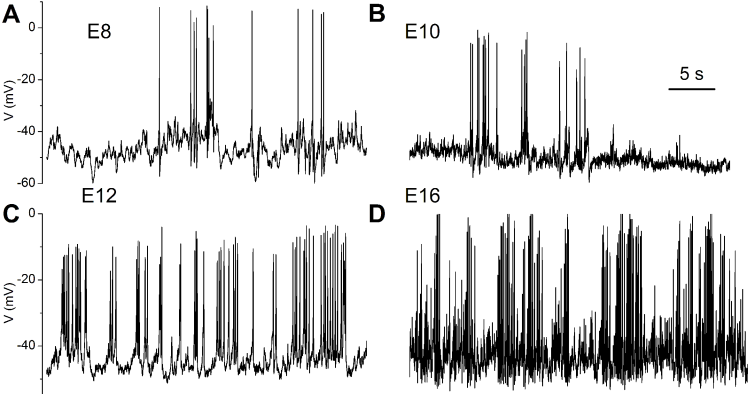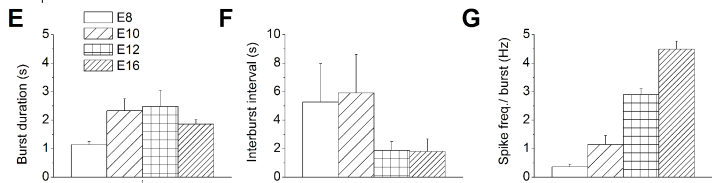

Supplement: pnas_0705927104_7.pdf [file pnas_0705927104_7.pdf]

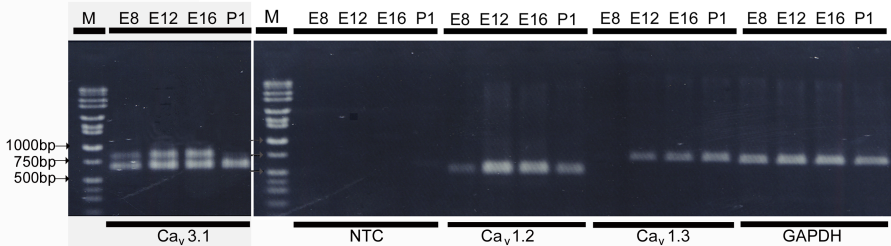

Supplement: pnas_0705927104_8.pdf [file pnas_0705927104_8.pdf]
